# Supplementary material for: H2S Removal via Sorption Process on Activated Carbon-Metal Oxide Composites Derived from Different Biomass Sources
Source: Preprints.org preprint supplement (doi:10.20944/preprints202310.0308.v1), 2023-10-06
Supplement: Supplementary file 1 [file supplementary]

# H<sub>2</sub>S removal via sorption process on activated carbon-metal oxide composites derived from different biomass sources

Maria Baikousi<sup>1</sup>, Anna Gantzoudi<sup>1</sup>, Christina Gioti<sup>1</sup>, Dimitrios Moschovas<sup>1</sup>, Aris Giannakas<sup>2</sup>, Apostolos Avgeropoulos<sup>1</sup>, Constantinos E. Salmas<sup>1\*</sup>, Michael A. Karakassides<sup>1\*</sup>

## Supporting Information

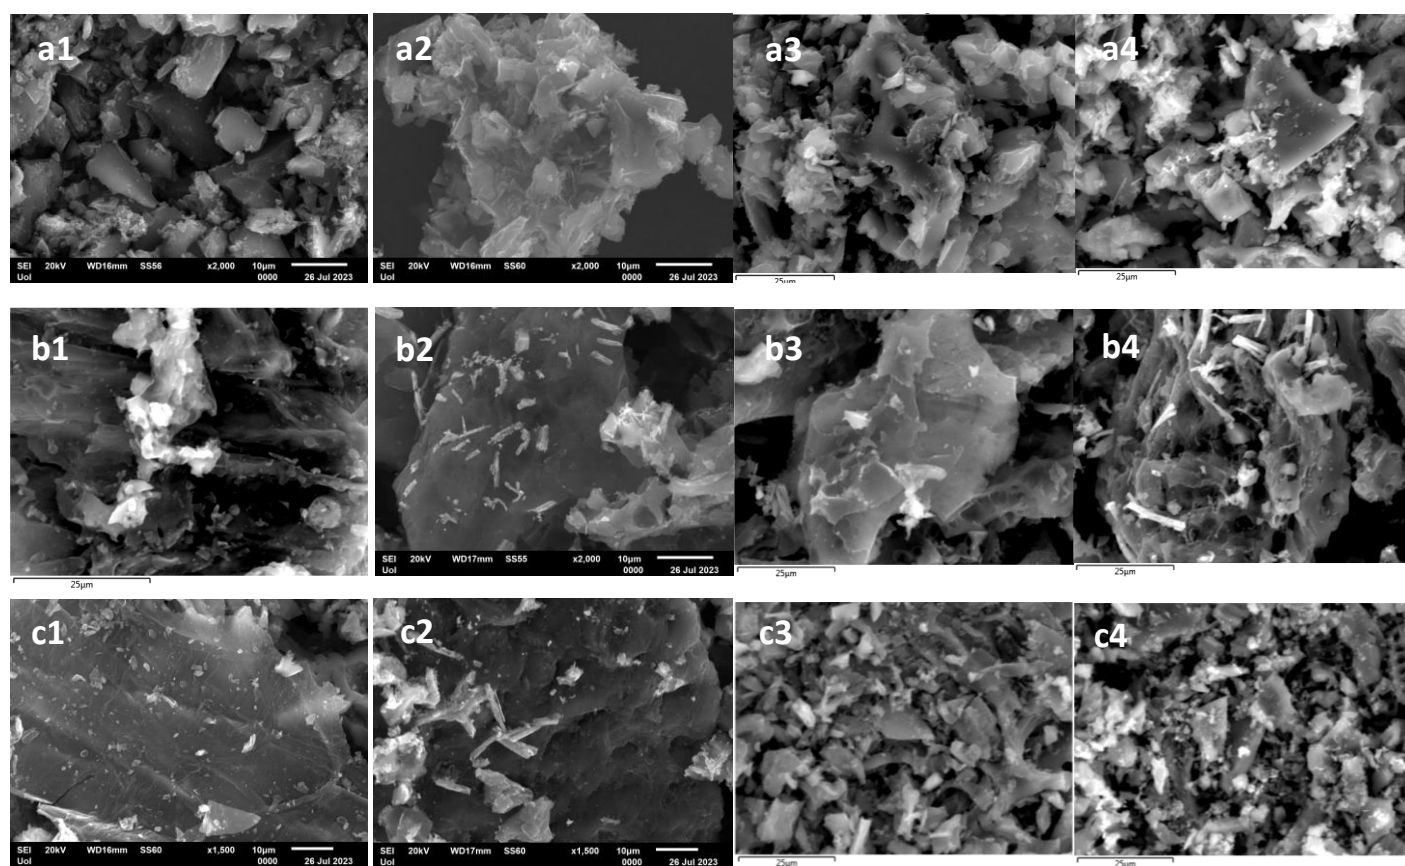

**Figure S1.** SEM images for pure AC and ZnO@AC composites before and after H<sub>2</sub>S removal process. (a) spent coffee, (b) aloe leaves, (c) corncob. (1) pure AC before H<sub>2</sub>S removal process, (2) ZnO@AC composites before H<sub>2</sub>S removal process, (3) pure AC after H<sub>2</sub>S removal process, (4) ZnO@AC composites after H<sub>2</sub>S removal process.
